# Supplementary material for: Solvent effects in heterogeneous selective hydrogenation of acetophenone: differences between Rh/C and Rh/Al2O3 catalysts and the superiority of water as a functional solvent
Source: Royal Society of Chemistry journal article supplement (doi:10.1039/c4gc02211d), 2015-01-01
Supplement: c4gc02211d1.pdf [file c4gc02211d1.pdf]

## Supporting Information

**Table S1** Solvatochromic parameters and H<sub>2</sub> solubility of various solvents<sup>1-6</sup>

| #  | Solvent                        | $\alpha$ (-) <sup>a</sup> | $\beta$ (-) <sup>b</sup> | $\Pi^*$ (-) <sup>c</sup> | X <sub>H<sub>2</sub></sub> x 10 <sup>4</sup> (-) <sup>d</sup> |
|----|--------------------------------|---------------------------|--------------------------|--------------------------|---------------------------------------------------------------|
| 1  | Water                          | 1.17                      | 0.18                     | 1.09                     | 0.14 <sup>[2]</sup>                                           |
| 2  | Ethyleneglycol                 | 0.90                      | 0.52                     | 0.92                     | 0.38 <sup>[3]</sup>                                           |
| 3  | Methanol                       | 0.98                      | 0.66                     | 0.60                     | 1.61 <sup>[2]</sup>                                           |
| 4  | Ethanol                        | 0.83                      | 0.77                     | 0.54                     | 2.06 <sup>[2]</sup>                                           |
| 5  | 2-Propanol                     | 0.76                      | 0.95                     | 0.48                     | 4.61 <sup>[4]</sup>                                           |
| 6  | 1-Butanol                      | 0.79                      | 0.88                     | 0.47                     | 2.63 <sup>[2]</sup>                                           |
| 7  | <i>t</i> -butanol              | 0.68                      | 1.01                     | 0.41                     | 3.28 <sup>[5]</sup>                                           |
| 8  | <i>N,N'</i> -dimethylformamide | 0.00                      | 0.69                     | 0.88                     | 1.47 <sup>[6]</sup>                                           |
| 9  | 1,4-Dioxane                    | 0.00                      | 0.37                     | 0.55                     | 1.84 <sup>[6]</sup>                                           |
| 10 | Diethyl ether                  | 0.00                      | 0.47                     | 0.27                     | 3.46 <sup>[2]</sup>                                           |
| 11 | Toluene                        | 0.00                      | 0.11                     | 0.54                     | 3.15 <sup>[2]</sup>                                           |
| 12 | Cyclohexane                    | 0.00                      | 0.00                     | 0.00                     | 4.14 <sup>[2]</sup>                                           |
| 13 | <i>n</i> -Hexane               | 0.00                      | 0.00                     | -0.08                    | 6.63 <sup>[2]</sup>                                           |

a. Hydrogen-bond-donation ability.<sup>1</sup>

b. Hydrogen-bond-acceptance ability.<sup>1</sup>

c. Polarity/polarizability index.<sup>1</sup>

d. H<sub>2</sub> solubility in mole fraction at 298 K and 1 atm.<sup>2-5</sup>

1. M. J. Kamlet, J. M. Abboud, M. A. Abraham, R. W. Taft, *J. Org. Chem.* 1983, **48**, 2877-2887.
2. The Chemical Society of Japan, *Kagaku-binran (Handbook of Chemistry)* Maruzen, Tokyo, **2004**.
3. E. Brunner, *J. Chem. Thermodyn.* 1980, **12**, 993-1002.
4. T. Katayama, T. Nitta, *J. Chem. Eng. Data* 1976, **21**, 194-196.
5. J. Pardo, A.M. Mainar, M.C. Lopez, F. Royo, J.S. Urieta, *Fluid Phase Equilib.* 1999, **155**, 127-137.
6. E. Brunner, *J. Chem. Eng. Data* 1985, **30**, 269-273.

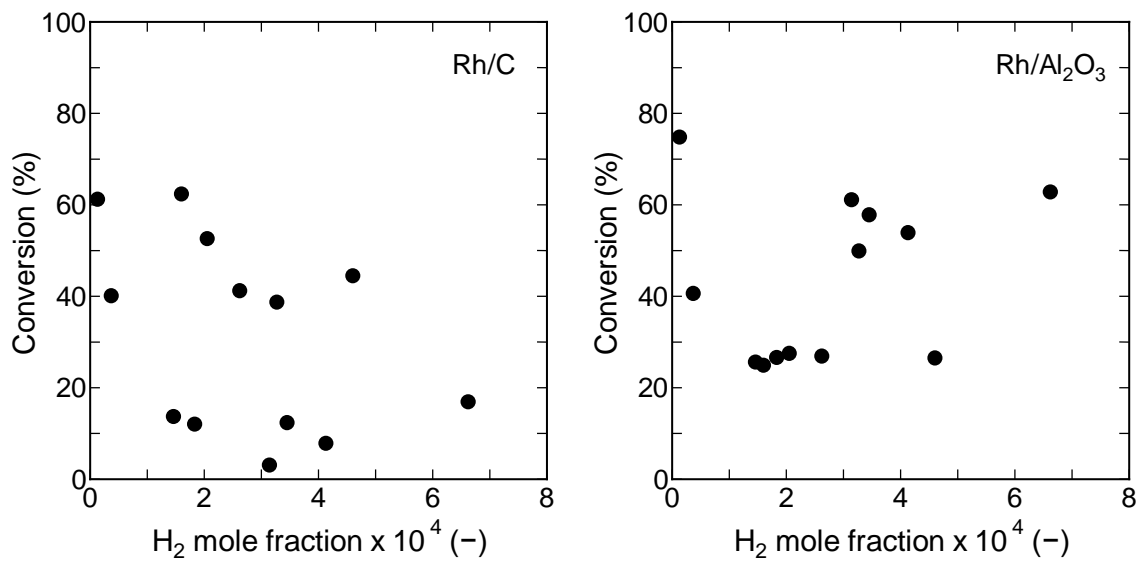

**Fig. S1.** Plots of total conversion observed in hydrogenation of acetophenone with Rh/C and Rh/Al<sub>2</sub>O<sub>3</sub> catalysts (Fig. 1) against the mole fraction of H<sub>2</sub> in solvents used (Table S1)

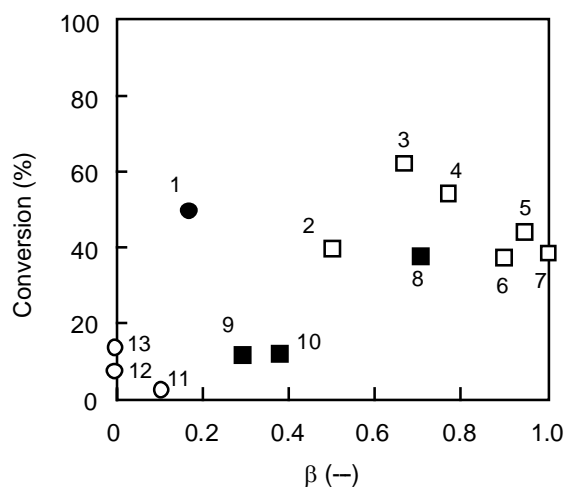

**Fig. S2.** The conversion over Rh/C vs. the  $\beta$  value of the solvents. Numbers given correspond to the different solvents in Fig. 1.

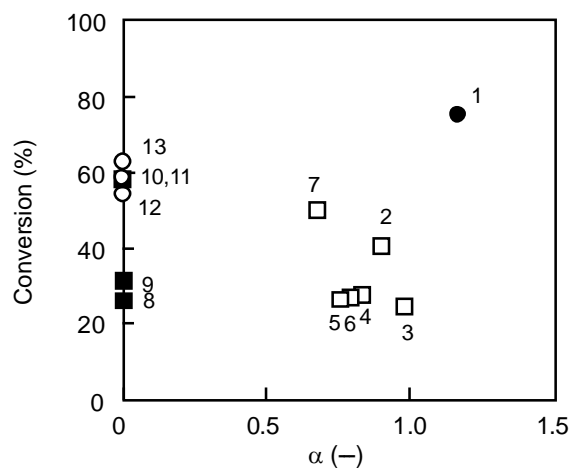

**Fig. S3.** The conversion over Rh/Al<sub>2</sub>O<sub>3</sub> vs. the  $\alpha$  value of the solvents. Numbers given correspond to the different solvents in Fig. 1.

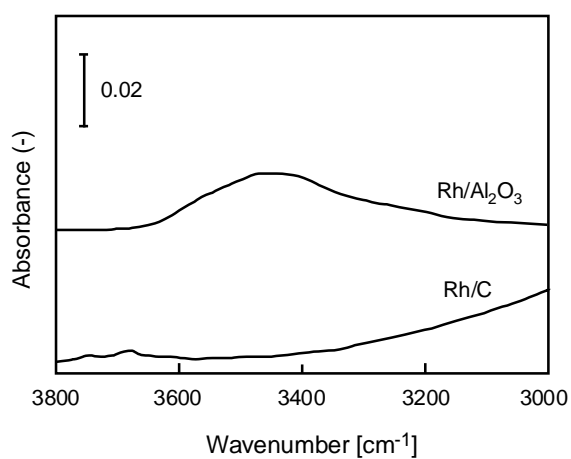

**Fig. S4.** Diffuse reflectance FTIR spectra of Rh/Al<sub>2</sub>O<sub>3</sub> and Rh/C in the range of surface OH vibration. For the measurements, the catalyst samples were diluted with KBr in a 1/200 weight ratio.
